1 **Rapid proteotyping reveals cancer biology and drug response determinants in the NCI-**  
2 **60 cells**

3  
4 Tiannan Guo <sup>1,19</sup> \*#, Augustin Luna <sup>2,3</sup>\*, Vinodh N Rajapakse <sup>4</sup>\*, Ching Chiek Koh <sup>1</sup>\*†,  
5 Zhicheng Wu <sup>19</sup>, Michael P Menden <sup>5</sup>, Yongran Cheng <sup>19</sup>, Laurence Calzone <sup>6</sup>, Loredana  
6 Martignetti <sup>6</sup>, Alessandro Ori <sup>7</sup>, Murat Iskar <sup>8</sup><sup>1</sup>, Ludovic Gillet <sup>1</sup>, Qing Zhong <sup>9</sup>, Sudhir Varma  
7 <sup>10</sup>, Uwe Schmitt <sup>11</sup>, Peng Qiu <sup>12</sup>, Yaoting Sun <sup>19</sup>, Yi Zhu <sup>1,19</sup>, Peter J Wild <sup>9</sup>, Mathew J Garnett  
8 <sup>13</sup>, Peer Bork <sup>8,14,15,16</sup>, Martin Beck <sup>8,17</sup>, Julio Saez-Rodriguez <sup>5</sup>, William C. Reinhold <sup>4</sup>, Chris  
9 Sander <sup>2,3</sup>, Yves Pommier <sup>4</sup>#, Ruedi Aebersold <sup>1,18</sup> #

10

11 \* Equal contribution

12 # correspondence

13

14 **Affiliations**

15 1, Department of Biology, Institute of Molecular Systems Biology, ETH Zurich, Switzerland

16 2, Department of Biostatistics and Computational Biology, Dana-Farber Cancer Institute,  
17 Boston, MA 02115, USA

18 3, Department of Cell Biology, Harvard Medical School, Boston, MA 02115, USA

19 4, Developmental Therapeutics Branch, Center for Cancer Research, National Cancer  
20 Institute, National Institutes of Health, Bethesda, MD 20892, United States

21 5, RWTH Aachen University, Faculty of Medicine, Joint Research Centre for Computational  
22 Biomedicine (JRC-COMBINE), Germany

23 6, Institut Curie, PSL Research University, INSERM, U900, Mines Paris Tech, F-75005,  
24 Paris, France.

25 7, Leibniz Institute on Aging, Fritz Lipmann Institute (FLI), Beutenbergstrasse 11, 07745  
26 Jena, Germany

27 8, Structural and Computational Biology Unit, European Molecular Biology Laboratory,  
28 69117 Heidelberg, Germany

29 9, Institute of Surgical Pathology, University Hospital Zurich, Zurich, Switzerland

30 10, HiThru Analytics, Laurel, MD 20707, USA

31 11, Scientific IT Services, ETH Zurich, Switzerland

32 12, Department of Biomedical Engineering, Georgia Institute of Technology and Emory  
33 University, 313 Ferst Dr., Atlanta, GA 30332, US

34 13, Sanger Institute, Wellcome Trust Genome Campus, Hinxton, Cambridge CB10 1SA, UK

35 14, Molecular Medicine Partnership Unit, University of Heidelberg and European Molecular  
36 Biology Laboratory, 69120 Heidelberg, Germany

37 15, Max Delbrück Centre for Molecular Medicine, 13125 Berlin, Germany

38 16, Department of Bioinformatics, Biocenter, University of Würzburg, 97074 Würzburg,  
39 Germany

40 17, Cell Biology and Biophysics Unit, European Molecular Biology Laboratory, 69117  
41 Heidelberg, Germany

42 18, Faculty of Science, University of Zurich, Zurich, Switzerland

43 19, Westlake Institute for Advanced Study, Westlake University, Hangzhou, Zhejiang, P. R.  
44 China

45

46 †, current address: Sanger Institute, Wellcome Trust Genome Campus, Hinxton, Cambridge  
47 CB10 1SA, UK

48 ‡, current address: Division of Molecular Genetics, German Cancer Research Center (DKFZ),  
49 Im Neuenheimer Feld 280, 69120 Heidelberg, Germany

50

51 **Summary**

52

53 We describe the rapid and reproducible acquisition of quantitative proteome maps for the  
54 NCI-60 cancer cell lines and their use to reveal cancer biology and drug response  
55 determinants. Proteome datasets for the 60 cell lines were acquired in duplicate within 30  
56 working days using pressure cycling technology and SWATH mass spectrometry. We  
57 consistently quantified 3,171 SwissProt proteotypic proteins across all cell lines, generating a  
58 data matrix with 0.1% missing values, allowing analyses of protein complexes and pathway  
59 activities across all the cancer cells. Systematic and integrative analysis of the genetic  
60 variation, mRNA expression and proteomic data of the NCI-60 cancer cell lines uncovered  
61 complementarity between different types of molecular data in the prediction of the response to  
62 240 drugs. We additionally identified novel proteomic drug response determinants for  
63 clinically relevant chemotherapeutic and targeted therapies. We anticipate that this study  
64 represents a landmark effort toward the translational application of proteotypes, which reveal  
65 biological insights that are easily missed in the absence of proteomic data.

## 66 **Introduction**

67

68 To date, mainly owing to the maturity and availability of high throughput DNA- and  
69 RNA- based techniques, forays into the molecular landscape of diseases, in particular cancers,  
70 have primarily focused on genomics and transcriptomics<sup>1-3</sup>. Protein-level measurements,  
71 although showing great potential for providing the granularity and details necessary for  
72 personalized therapeutic decisions, are underutilized due to technical hurdles. Advances in  
73 data-dependent acquisition (DDA) mass spectrometry (MS) have permitted quantitative  
74 proteomic profiling of about 100 tumor samples using multi-dimensional fractionated MS  
75 analyses of each sample<sup>4-6</sup>, demonstrating the added value of protein measurement in  
76 classifying tumor samples. Nevertheless, such DDA workflows suffer from relatively lower  
77 sample-throughput, relatively higher sample consumption and technical complexity,  
78 precluding their routine use in clinically relevant applications (*e.g.* drug response prediction)  
79 on the speed and scale achieved by genomic and transcriptomic approaches<sup>2,3</sup>.

80

81 To achieve reproducible and high throughput proteomic profiling, we have developed  
82 a workflow<sup>7,8</sup> integrating pressure cycling technology (PCT), an emerging sample  
83 preparation method that accelerates and standardizes sample preparation for proteomic  
84 profiling<sup>9</sup>, together with SWATH-MS, an MS-based proteomic technique that consists of  
85 data independent acquisition (DIA) and a targeted data analysis strategy with unique  
86 advantages over other MS-based proteomic methods<sup>10,11</sup>. With this technique all MS-  
87 measurable peptides of a sample are fragmented and recorded in a recursive fashion, thus  
88 generating digital proteome maps that can be used to reproducibly detect and quantify  
89 proteins across high numbers of samples without the need of isotope labeling. The PCT-  
90 SWATH technique thus significantly increases the sample throughput and data reproducibility  
91 providing excellent quantitative accuracy, and in the meantime reduces sample consumption  
92 to ca. 1 microgram of total peptide mass per sample<sup>7,8</sup>.

93

94 In this study, we describe the acquisition of proteome maps of the NCI-60 cell lines in  
95 duplicate by PCT-SWATH. The 120 proteome maps were acquired within 30 working days  
96 on a single instrument and each sample consumed ca. 1 microgram of total peptide mass. We  
97 consistently quantified 3,171 SwissProt proteotypic proteins across all cell lines, generating a  
98 data matrix (120 proteomes vs. 3171 proteins) with 0.1% missing values. Raw signals of each  
99 peptide and protein in each sample were curated with an expert system. The NCI-60 human

100 cancer cell line panel contains 60 lines from 9 different tissue types <sup>12</sup>. The NCI-60 have been  
101 molecularly and pharmacologically characterized with unparalleled depth and coverage,  
102 offering a prime *in vitro* model to further our understanding of cancer biology and cellular  
103 responses to anti-cancer agents <sup>12, 13</sup>. Discoveries enabled by the NCI-60 in recent years  
104 include the development of the FDA approved drugs oxaliplatin for the treatment of colon  
105 cancers <sup>14</sup>, eribulin for metastatic breast cancers <sup>12</sup>, bortezomib for the treatment of multiple  
106 myeloma <sup>15</sup>, and rhomidepsin for cutaneous T-cell lymphomas <sup>16</sup>. The sensitivity of the NCI-  
107 60 has been measured for over 100,000 synthetic or natural compounds derived from a wide  
108 range of academic and industrial sources <sup>12</sup>, constructing the most comprehensive resource for  
109 cancer pharmacological research. The proteomic data complement the existing NCI-60  
110 molecular landscapes, allowing systematic investigation of the complementarity among  
111 genomics, transcriptomics and proteomics in a number of applications.

112

113         The proteome of the NCI-60 cells has been analyzed previously by data dependent  
114 analysis (DDA), a commonly used discovery mass spectrometry technique <sup>17</sup>. Whereas the  
115 study reported the cumulative identification of 10,350 IPI proteins from about 1,000  
116 fractionated and kinase-enriched sample runs, only 492 IPI proteins were quantified across the  
117 NCI-60 cell lines without missing value. The present study thus extends the number of  
118 consistently quantified proteins, in duplicates, to 3,171, with a ca. six-fold increase. The high  
119 quality proteomic data were used for pharmacoproteomic analysis of the response of the cell  
120 panel to 240 anti-cancer drugs, resulting in the identification of novel proteomic drug  
121 response determinants for clinically relevant chemotherapeutic and targeted therapies.

## 122 **Results**

123

### 124 **Acquisition of the NCI-60 proteome maps**

125

126 We applied the PCT-SWATH workflow <sup>7</sup> to generate quantitative proteome maps of  
127 the NCI-60 cell lines in technical replicates, resulting in the generation of 120 SWATH maps  
128 with high reproducibility at the raw data level (**Supplementary Fig. 1**). The PCT-assisted  
129 sample preparation took about 18 working days and the SWATH-MS analyses consumed  
130 about 12 working days. Thus, the entire process, from sample preparation to data acquisition,  
131 was accomplished within 30 working days, at an unprecedented sample-throughput compared  
132 to other cancer proteomic research of comparable scale <sup>4-6, 17</sup>, which is due to the elimination  
133 of multiple dimensional fractionation, using one barocycler and one mass spectrometer  
134 (**Supplementary Fig. 1, Supplementary Table 1**).

135

136 SWATH proteome maps contain fragment ion chromatograms from all MS-  
137 measurable peptides, albeit in a highly convoluted form. To interpret the SWATH maps, we  
138 built a human cancer cell line spectral library containing 86,209 proteotypic peptides, *i.e.*  
139 peptides that uniquely identify a specific protein, from 8,056 SwissProt proteins  
140 (**Supplementary Table 1**). Using this library and the OpenSWATH software <sup>11</sup>, we identified  
141 6,556 protein groups, covering 81% of the library (**Supplementary Fig. 2**). To avoid  
142 ambiguity of peptide/protein quantification, we limited our analyses to canonical and  
143 proteotypic peptides and proteins by excluding protein isoforms, un-reviewed protein  
144 sequences, and peptide/protein sequence variants.

145

146 We evaluated the technical variation of each measurement through manual inspection  
147 of the OpenSWATH results based on the replicated measurement for each cell line and  
148 observed in multiple cases substantial technical variation. This is probably due to the fact that  
149 cell type-specific interfering signals leads to invalid SWATH assays, and the presence of  
150 irregular liquid chromatography (LC) and MS behavior of certain peptides in the highly  
151 variable proteomic context of the NCI-60 cells. These phenomena have also been observed  
152 previously in selected reaction monitoring (SRM)-based targeted proteomics studies <sup>18</sup>.

153

154 To obtain high accuracy quantitative data for the cell lines, we further developed an  
155 expert system, *i.e.* DIA-expert (see Methods), to refine the peptide identification and

156 quantification provided by automated analysis tools like OpenSWATH (**Fig. 1A**). We thus  
157 excluded proteins and peptides that were not reproducibly quantified in technical replicates  
158 and focused our analyses on a shorter list of 22,554 proteotypic peptides from 3,171 proteins,  
159 with 8% missing values at the peptide level and 0.1% missing values at the protein level  
160 across all MS runs (**Supplementary Table 1**). On average, 7 peptide precursors and 6 unique  
161 peptide sequences were identified for each protein (**Fig. 1B**). Several proteins were identified  
162 with over 200 peptides (**Fig. 1C**). The proteins excluded by DIA-expert may not be incorrect  
163 identifications, but rather proteins that could not achieve reproducible quantification by the  
164 existing algorithm across all cell lines due to either technical issues, for instance the signal-to-  
165 noise ratio, or biological issues such as post-translational modifications and splicing variants.  
166 Improved computational methods will likely rescue some of them in the future.

167

168 Most peptides for the 3,171 proteins were consistently quantified in all cell lines at  
169 both MS1 and MS2 levels. Two representative peptides are shown in **Fig. 1A**. The coefficient  
170 of determination ( $R^2$ ) between technical replicates, for overall expression of peptides (**Fig.**  
171 **1D**) and proteins (**Fig. 1E**), were 0.974 and 0.978, respectively, with a dynamic range over 5  
172 orders of magnitude (**Fig. 1F**). We provide the raw MS signals for each quantitative value in  
173 **Supplementary File 1**, allowing visual inspection of the MS signal for every peptide in each  
174 sample. When we limited the minimal peptide number per protein to 2, 3 and 4, fewer  
175 proteins were quantified however the quantitative accuracy did not substantially improve  
176 (**Supplementary Figure 3**).

177

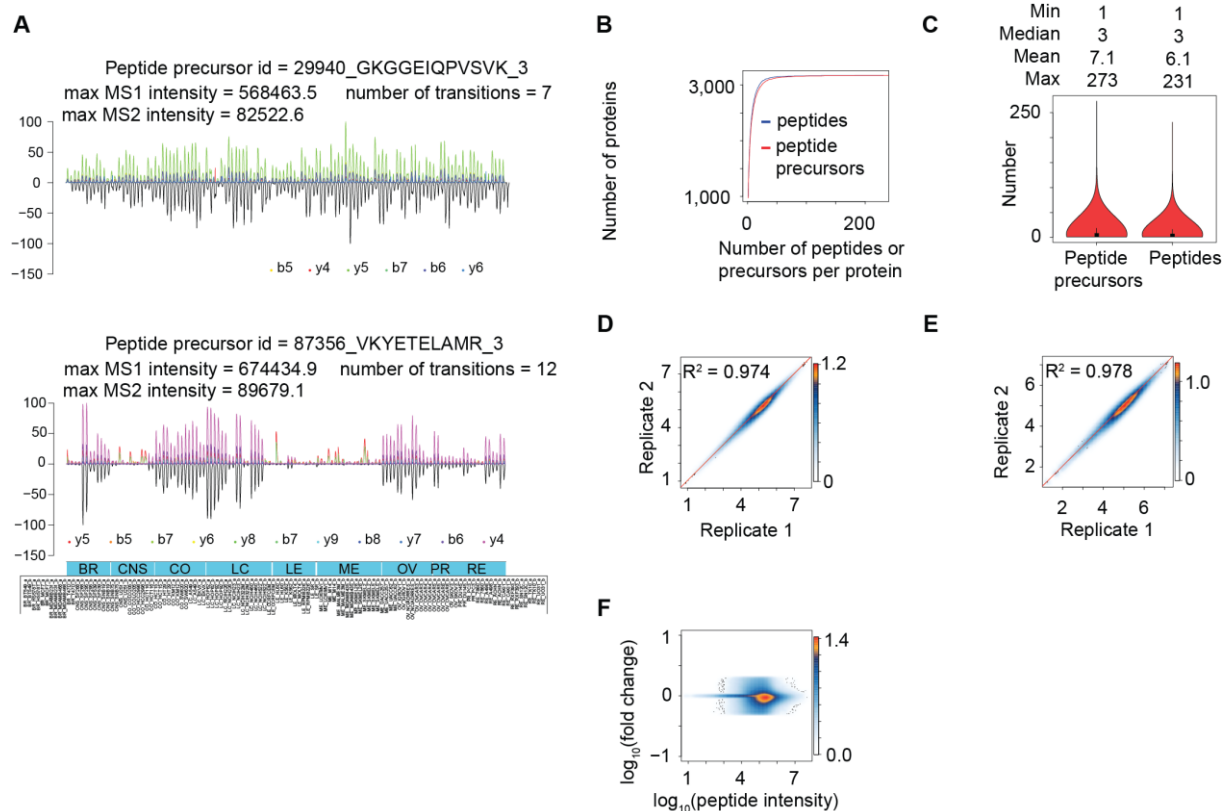

178  
 179 **Figure 1. The acquisition of NCI-60 proteotype.** (A) Representative peptide signals as curated and visualized  
 180 by the DIA-expert software. (B) The cumulative number of peptide and peptide precursors identified for each  
 181 protein. (C) The distribution of peptide precursors and peptides per protein. The overall Pearson correlation  
 182 between technical replicates at the peptide level (D) and the protein level (E). Here, the log<sub>10</sub> transformed  
 183 intensity of each peptide/protein in each cell line technical replicate is plotted in the heatmap. (F) Dynamic range  
 184 of the MS signals for 22,968 proteotypic peptides.

185

## 186 Characterization of the NCI-60 quantitative proteomes

187

188 The landscape of the 120 thus measured proteotypes is displayed in **Fig. 2A**. All  
 189 technical replicates were clustered together using an unsupervised method based on the  
 190 quantified proteotypes, confirming high quantitative accuracy. In most cases, the proteotypes  
 191 are not strikingly different across different cancer cell lines, in sharp contrast with the distinct  
 192 proteomes of tumor versus non-tumor kidney tissues<sup>7</sup>. The median coefficient of variation  
 193 (CV) of the protein intensity in different cells was 48%. The CV demonstrated a low  
 194 dependence on protein abundance, as evident from the distribution of its values for different  
 195 expression level quantile groups of the measured proteins (**Fig. 2B**). We then compared our  
 196 data with the previously reported proteome of the NCI-60 cells using DDA-MS<sup>17</sup>. While the  
 197 DDA data reported comparable number of IPI protein groups to the SwissProt proteotypic  
 198 protein number from this SWATH data set, the SWATH data exhibited much higher degree of



199 consistency (Supplementary Table 2 and Supplementary Fig. 5) and better quantitative  
 200 accuracy (Supplementary Fig. 6-7).

201

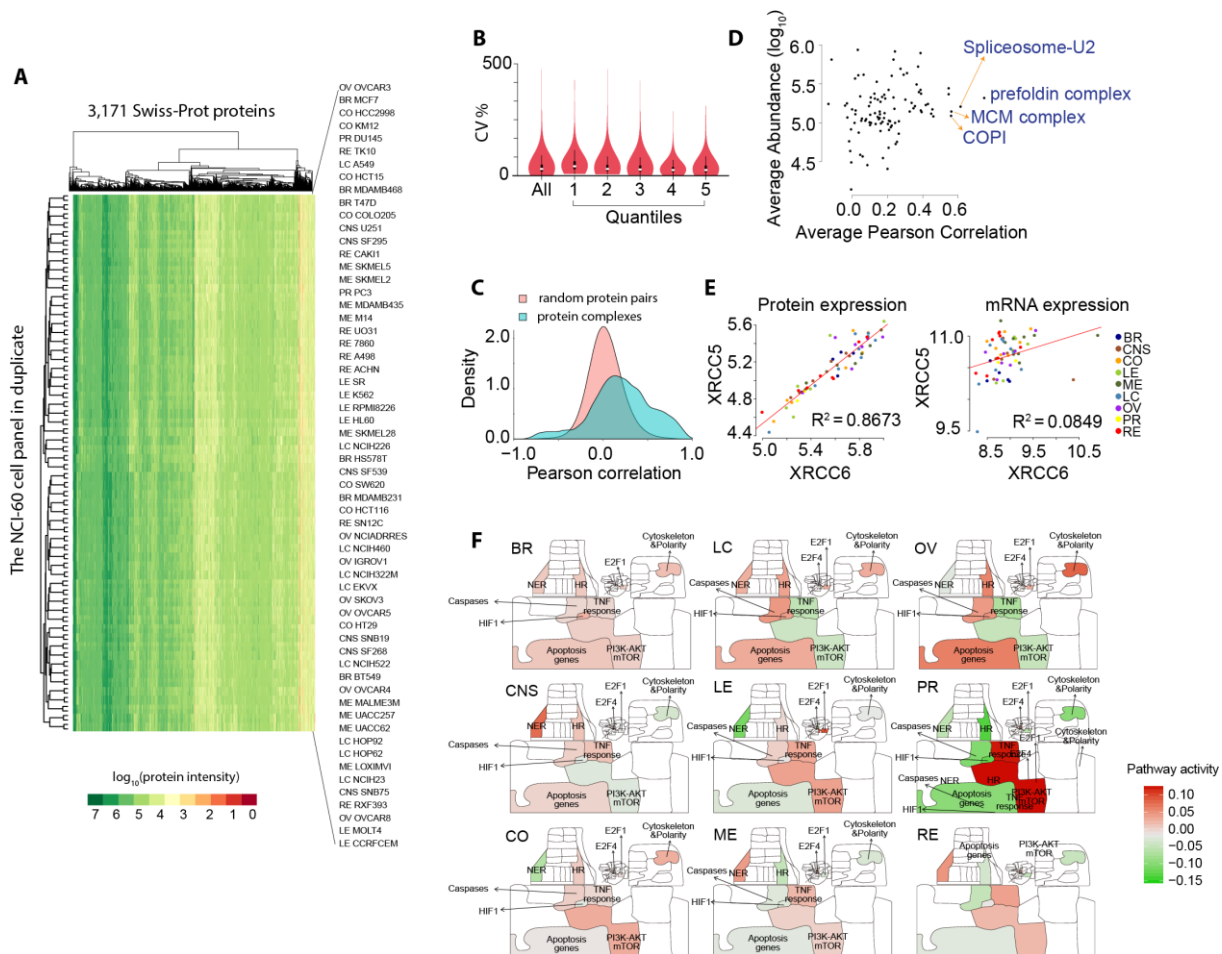

202

203

204 **Figure 2. Characterizing NCI-60 quantitative proteomes.** (A) Heatmap overview of NCI-60 proteotype data  
 205 matrix. 3,171 Swiss-Prot proteins were quantified in 120 SWATH runs. (B) Variation of protein expression, for  
 206 all proteins (All) and proteins in each abundance quantile group (from low abundance to high abundance). (C)  
 207 Density plot of correlation of determination between pairs of random proteins versus pairs of proteins within a  
 208 complex. (D) Stoichiometry variation of protein complexes in the NCI-60 cells. The x-axis shows the average  
 209 Pearson correlation of each protein complex across the NCI-60. The y-axis shows the average abundance of  
 210 proteins in a complex. Stable complexes tend to show higher values of average Pearson correlation. (E) Protein  
 211 and mRNA expression of XRCC6/Ku70 and XRCC5/Ku80. (F) Visualization of pathway activity in NCI-60  
 212 proteotypes. More detailed pathway annotations for this Google map are provided in **Supplementary File 2**.

213

## 214 Quantification of drug-responsiveness related proteins

215

216 The proteotypes covered 105 protein targets for FDA-approved anti-cancer  
 217 compounds, 661 protein drug targets annotated in DrugBank<sup>19</sup> (including 68 drug

218 metabolizing enzymes, 5 drug carriers, and 15 drug transporters), 694 proteins known to  
219 participate in human diseases<sup>19,20</sup>, and 58 human protein kinases, in addition to proteins  
220 involved in various biological functions (**Supplementary Table 3**). Some kinases were found  
221 to be broadly expressed in most cells with high abundance, including MST4 and WNK1  
222 (**Supplementary Fig. 4**), consistent with previous reports<sup>21,22</sup>. Other kinases were highly  
223 expressed in specific cell lines, for example, EGFR in the breast cancer cell line  
224 MDAMB468, ERBB2 in SKOV3 cells, and CDK6 in MOLT4 cells, in agreement with  
225 previous studies using antibody-based methods<sup>20,23</sup>.

226

227 One unique benefit of our proteomic data set, compared to genomic and transcriptomic  
228 data, is its capacity to reveal more accurate information about the abundance of protein  
229 complexes and their stoichiometry<sup>24</sup>. Our measurements included 101 protein complexes  
230 comprising 1,045 proteins (**Supplementary Table 4**) from a curated resource<sup>24</sup>. Significantly  
231 higher Pearson correlation coefficients for pairs of proteins that are part of a complex further  
232 supported the quantitative accuracy of our data matrix (**Fig. 2C**). We applied our  
233 computational pipeline for analyzing co-expression of protein complex numbers<sup>24</sup> to the  
234 NCI-60 proteotype data and confirmed conserved stoichiometry of protein complexes such as  
235 the prefoldin and MCM complexes in various cell lines (**Fig. 2D**). In a specific case, we  
236 observed a high correlation between the protein expression of XRCC6/Ku70 and  
237 XRCC5/Ku80, a critical heterodimer involved in DNA repair and responsible for resistance to  
238 radiotherapy and chemotherapy. Ku80 is degraded when not bound to Ku70<sup>25,26</sup>.

239 Remarkably, this correlation is not detectable using mRNA measurements (**Fig. 2E**),  
240 indicating that expression of Ku80 is tightly regulated by protein degradation mechanisms  
241 independent of cancer types. Indeed, a recent report has shown that RNF8, an E3 ubiquitin  
242 ligase, regulates the expression of Ku80 via its removal from DNA double strand break sites  
243 and its degradation through ubiquitination<sup>27</sup>.

244

### 245 **Google-map-based visualization of cancer signaling pathways**

246

247 The NCI-60 proteotypes cover 648 proteins in the Atlas of Cancer Signaling Networks  
248 (ACSN), a manually curated pathway database presenting published facts about biochemical  
249 reactions involved in cancer using a Google-Maps-style visualization (**Supplementary Fig. 8**)  
250<sup>28</sup>. When mapping the mean protein expression per cancer type, we found that multiple  
251 pathways in different cell types, including apoptosis, cell survival, motility and DNA repair

252 among others, displayed a similar pattern (**Supplementary File 2**), consistent with the fact  
253 that the immortal cells retain cancer hallmarks after artificial culturing<sup>29</sup>. An example of a  
254 clear proteotypic pattern is the delta isoenzyme of protein kinase C, *i.e.* PRKCD, involved in  
255 DNA repair and a drug target that has been tested in various cancers<sup>30</sup>. It was reported to be  
256 absent in four renal clear cell carcinoma lines<sup>31</sup>. In agreement, this protein stood out in our  
257 visualization, with significantly lower protein expression in renal carcinoma, relative to the  
258 average expression in the NCI-60 panel. We provided detailed instructions on how to navigate  
259 through the atlas and explore protein abundance in each cancer cell line (see **Supplementary**  
260 **File 2**).

261  
262 We next compared the activity of cellular pathways using ROMA (Representation and  
263 quantification Of Module Activities)<sup>32</sup> (**Fig. 2F**), a gene-set-based quantification algorithm.  
264 This approach revealed substantial diversity of pathway activity between different proteotypes  
265 as evidenced by two-tailed *t*-tests of activity scores ( $P$ -value < 0.05). When mapping activity  
266 scores onto ACSN, some tissue specificities were revealed, with particular cell line  
267 proteotypes displaying distinct patterns of pathway activity. For instance, the activity of  
268 apoptosis (with both Caspases and Apoptosis Genes modules) was found to be significantly  
269 higher in ovarian cell lines (see **Supplementary Table 5**). Although there are only two  
270 prostate cancer cell lines in the panel, our analysis was able to highlight modules including  
271 “AKT-mTOR” and “Apoptosis”, whose differential activity can be attributed to HSP90AA1  
272 and PRDX. The latter protein has been independently reported to be overexpressed in prostate  
273 tumors<sup>33</sup>.

274

### 275 **Accessibility of the NCI-60 proteotypes**

276

277 To enable easy data access, visualization, and comparison with other NCI-60 data sets,  
278 we have incorporated the SWATH data into the CellMiner database<sup>13,34</sup>. CellMiner allows  
279 the direct download of the data, as well as comparative and integrative analyses with other  
280 molecular data and pharmacological data, *e.g.* sensitivity of each cell line to over 20,000  
281 compounds, and the manual inspection of specific genes, up to 150 per query. The detailed  
282 instructions for using this resource are provided on the project website  
283 (<https://discover.nci.nih.gov/cellminer/>) and in **Supplementary Fig. 9**. We have also  
284 deposited raw data and processed data matrices of the NCI-60 proteotype in public databases,  
285 including PRIDE<sup>35</sup> and ExpressionArray<sup>36</sup>.

286

## 287 **Predicting drug responsiveness**

288

289         The robust, quantitative proteomic data, with almost no missing values, permitted  
290 systematic investigation of whether integration of the SWATH-based proteotype with existing  
291 genomic and transcriptomic features improves the prediction of drug responsiveness  
292 (**Supplementary Table 6**). We generated various combinations of molecular features, and  
293 evaluated their predictive power using the Pearson correlation between predicted and  
294 observed drug response values for 240 FDA-approved or investigational compounds in  
295 CellMiner<sup>13, 34, 37</sup>. Each compound is assigned a NSC (National Service Center) identifier  
296 upon submission to the National Cancer Institute for evaluation in the NCI-60 panel. The  
297 largest groups of drugs with target annotations are those that interfere with DNA synthesis  
298 and the DNA damage response, including topoisomerase inhibitors. The drug set also contains  
299 dozens of targeted agents, including 18 serine and threonine kinase inhibitors and 18 tyrosine  
300 kinase inhibitors (**Fig. 3A**).

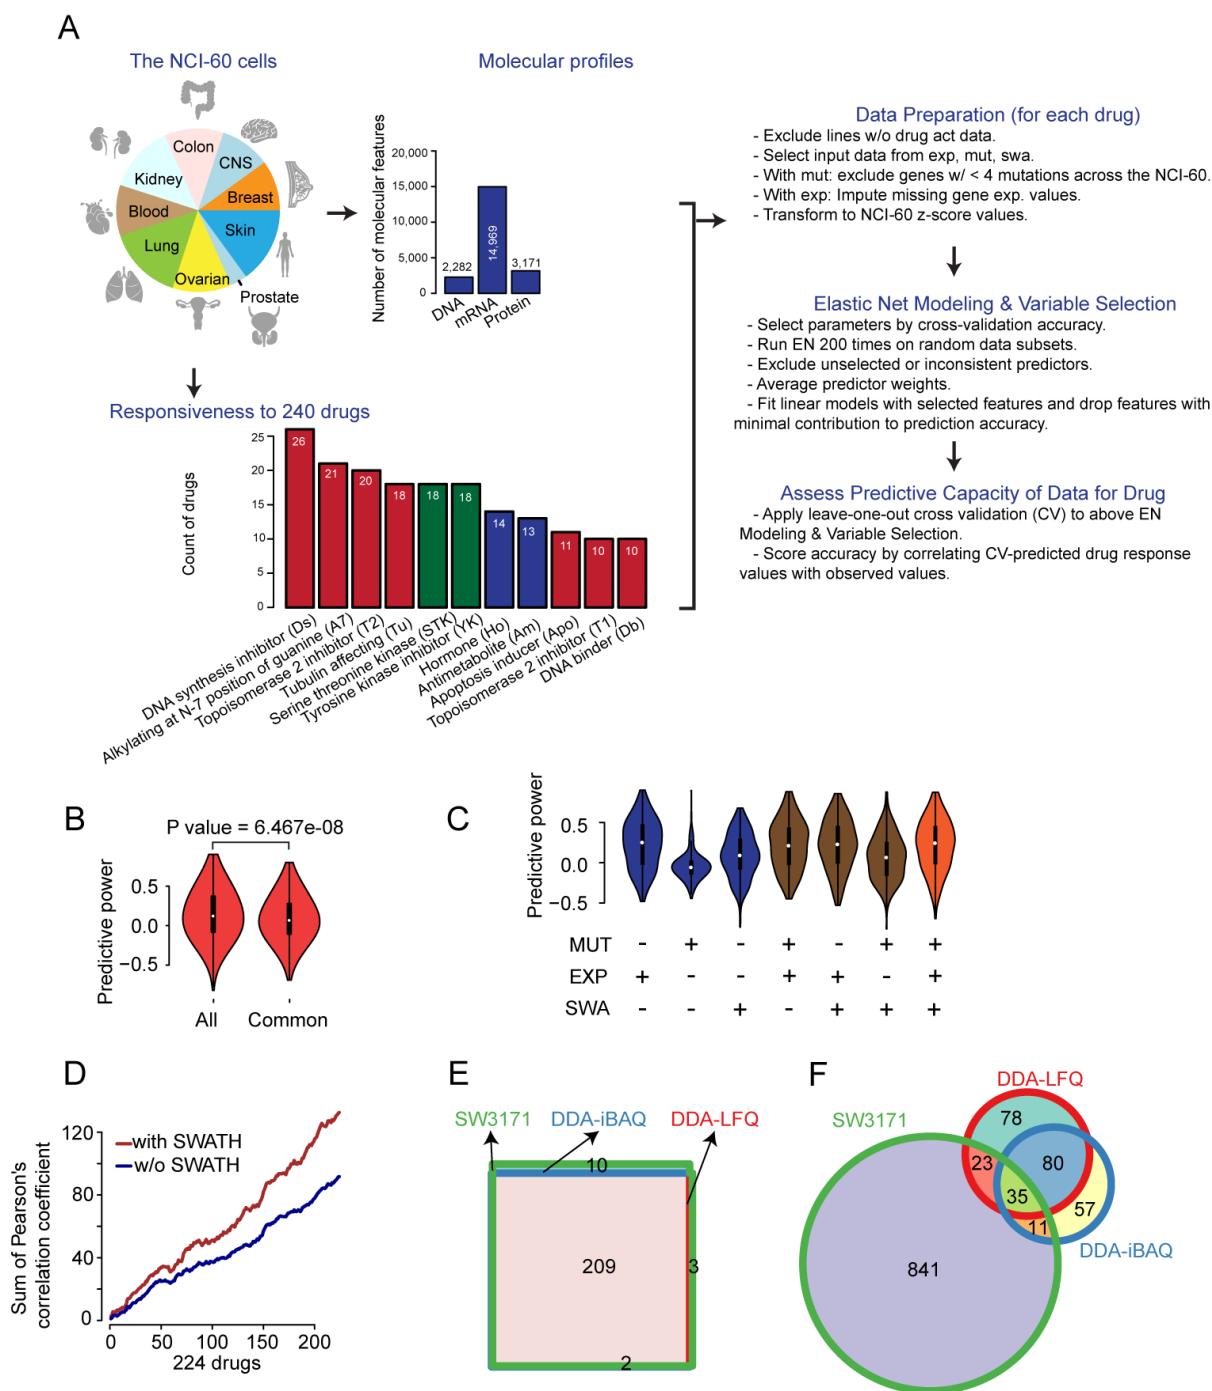

301

302

303 **Figure 3. Prediction of drug responsiveness.** (A) Workflow for drug responsiveness prediction. Drug groups

304 with at least ten drugs are shown. (B) Distribution of predictive power (Pearson's correlation of cross-validation

305 predicted vs. observed response) for 240 compounds using all molecular features (All) versus common features

306 (Common) available for all molecular data types. (C) Distribution of predictive power for different molecular

307 data sets and their combinations. (D) Cumulative sum of Pearson correlation coefficients from drug

308 responsiveness prediction in 224 drugs. (E) Venn diagram of drugs successfully modeled using elastic net using

309 our SWATH data containing 3171 proteins (SW3171), and the DDA data based on iBAQ (DDA-iBAQ) and

310 LFQ (DDA-LFQ). (F) Venn diagram of protein predictors using the SWATH and DDA data sets.

311

312 Using the elastic net algorithm, we then developed multivariate linear models to  
313 predict the NCI-60 response for each compound based on genomic, transcriptomic and  
314 proteomic features. The Pearson's correlation between observed drug response values and  
315 leave-one-out cross validation-predicted response values was applied to evaluate the  
316 performance of each predictive model.

317

318 As different numbers of features were measured for each omics data set, two strategies  
319 were adopted in the modeling analyses. First, we used all omics features (2,282 DNA  
320 mutations, 14,969 mRNAs and 3,171 proteins), separately and combinatorically, as inputs to  
321 evaluate the general performance. Second, we selected 1,566 features that were available for  
322 all three molecular data types (denoted as common features). In both cases, we obtained valid  
323 models for 224 (93%) of the drugs. The predictive power achieved with all features was  
324 slightly higher than that obtained using the common features for all three data types (**Fig. 3A**);  
325 a likely reason for this is that the latter excluded some genomic and transcriptomic features  
326 not detected at the protein level. We accordingly derived our main analysis results from data  
327 including all available molecular features. Our modeling led to the discovery of valid  
328 biomarkers for drug responsiveness prediction. For instance, we found that the mRNA  
329 expression of SLFN11, strikingly responsible for the sensitivity of 45 compounds, out of  
330 which 39 were FDA-approved drugs including topoisomerase inhibitors, alkylating agents,  
331 and DNA synthesis inhibitors, was the most dominant indicator, in agreement with our  
332 previous report<sup>38</sup> (**Supplementary Table 7**). Fourteen ATP-binding cassette family  
333 transporters, detected as mutation, transcript or protein levels, were found responsible for  
334 sensitivity prediction of 51 compounds including chemotherapeutic agents and protein-  
335 targeting agents such as HDAC inhibitor Depsipeptide, HSP90 inhibitor Alvespimycin,  
336 mTOR inhibitor Temozolomide and BCR-ABL inhibitor Nilotinib (**Supplementary Table 7**).

337

338 For ease of reproducibility of data analysis, we developed a Docker container  
339 (described in **Methods**) that includes our code and other essential dependencies, allowing all  
340 analyses to be replicated and extended for this and other omics data sets.

341

342

343 **Synergies among mutations, transcripts and proteins**

344

345 Our pipeline led to the identification of valid models for 224 compounds  
346 (**Supplementary Table 8**). Given the relatively small sample size, it was not surprising that  
347 accurate predictive models could not be found for every drug, particularly those with limited  
348 numbers of responsive lines. We found that the SWATH-MS derived proteotypes displayed  
349 higher percentage of predictive features than mutations and transcripts. 1,090 (34%) out of  
350 3,171 SWATH features are predictive, while 284 (12%) out of 2,282 features for mutations  
351 and 1,976 (13%) out of 14,969 transcripts were selected in the models. In general, the  
352 SWATH data outperformed the mutation data, however, the mRNA expression data set has  
353 about a five to six-fold higher number of features than the protein and mutation data sets (**Fig.**  
354 **3A**) and exhibited better overall performance (**Fig. 3C**).

355  
356 Our analyses revealed notable synergies among the different molecular measurements.  
357 Each type of molecular data set demonstrated indispensable benefits in predicting the  
358 response to certain drugs/compounds. The responsiveness of 35 compounds (16%) out of 224  
359 was best predicted with SWATH data, whereas 107 compounds (48%) were best predicted by  
360 SWATH data or by combining SWATH data with transcripts and/or DNA data. The most  
361 accurate models for over half of the compounds required at least two different types of  
362 molecular features. We then computed accumulative sum of Pearson correlation coefficient  
363 based on drug responsiveness prediction and observed significant contribution of SWATH  
364 data (**Fig. 3D**). We also compared the predictive power of the DDA data to the SWATH data.  
365 While the DDA data were able to generate elastic net models for comparable number of drugs  
366 (**Fig. 3E**), the number of protein predictors is much lower than SWATH data over some  
367 overlap (**Fig. 3F**).

### 368 369 **Drug responsiveness prediction**

370  
371 Based on the integration of various data sets, global drug response patterns were  
372 predicted for the 158 well-modeled drugs (**Fig. 4**, see Methods), with predictive molecular  
373 features for individual compounds provided in **Supplementary Table 8**. The data generated  
374 from this computational pipeline were validated by the recovery of established  
375 pharmacogenomic knowledge. For instance, the mutational status of BRAF was the top  
376 predictive molecular feature for sensitivity to BRAF inhibitors, *e.g.* vemurafenib (NSC  
377 761431) and dabrafenib (NSC 764134), and this association was particularly evident in

378 melanomas. Activated BRAF mutational status also sensitized cells to the MEK inhibitor  
 379 hypothemycin (NSC: 354462), as has been previously described<sup>39</sup>.

380  
 381

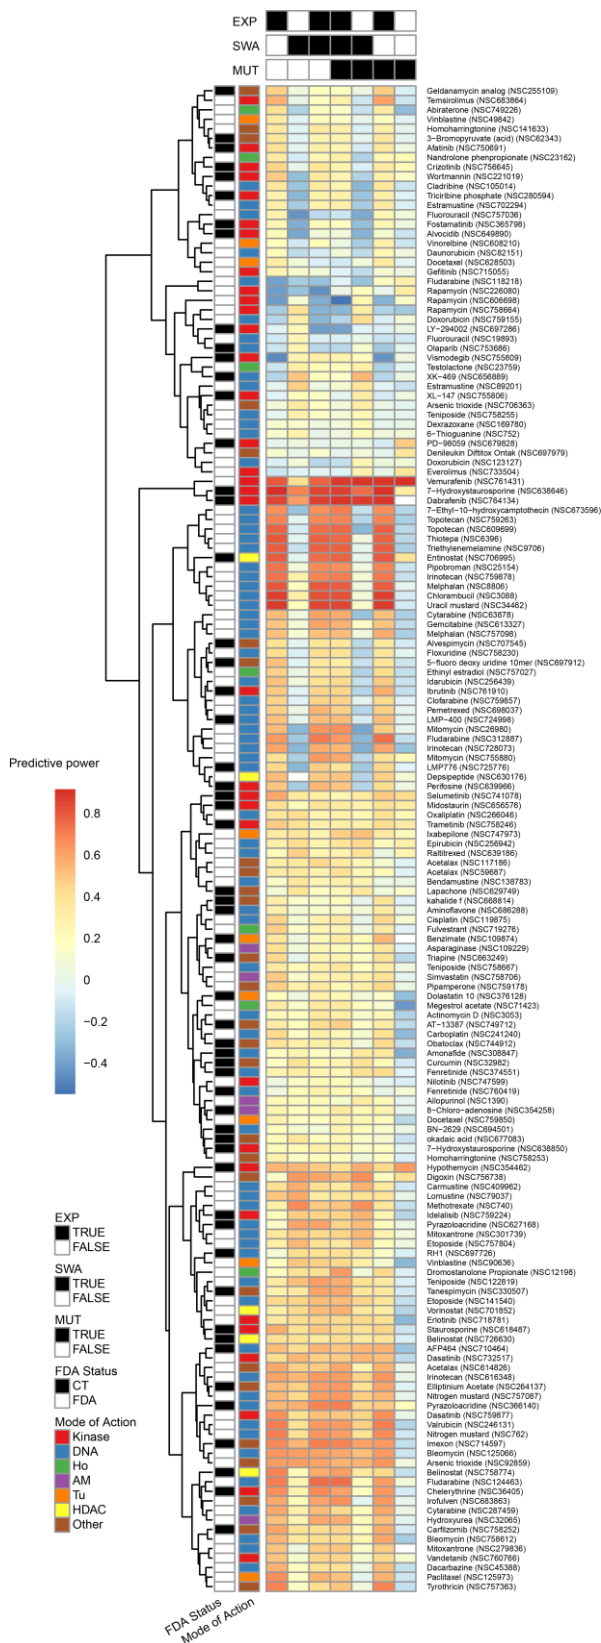

382



383 **Figure 4.** Predictive power for 224 compounds using different types of omics data. We applied elastic net and  
384 cross validation to evaluate the drug response predictive accuracy for each omics data set and combinations of  
385 data sets for 224 drugs which could be effectively modeled. Drug response prediction accuracies across input  
386 data types are clustered without supervision. MoA of compounds and clinical status of the compounds are  
387 colored. Each column indicates an input data type or combination of types; each row represents a compound.  
388 The color indicates the predictive power measured by Pearson correlation of cross-validation predicted versus  
389 observed drug response values. Black indicates that a valid elastic net model could not be obtained.

390

391 Sensitivity to the antimetabolite 6-thioguanine (6-TG, NSC: 752) (**Fig. 5A**) was  
392 predicted by protein expression of NUDT5 and MAT2B within an elastic net model  
393 composed of 5 proteomic features: NUDT5, MAT2B, CD47, STX12 and GFAP. The cross-  
394 validation accuracy with this compound and the SWATH-MS data was relatively low ( $r =$   
395 0.27), probably due to instability in the selected predictive features with limited sample size.  
396 Still, we find that for the two strongest predictors in the model, NUDT5 and MAT2B, the  
397 expression data were significantly correlated with the activity of 6-TG (Fig. 5B and 5C).  
398 Additionally, we were able to relate the inter-connected activities of these two proteins to the  
399 mechanism of action for 6-TG. In the purine salvage pathway, HPRT1 catalyzes synthesis of  
400 inosine monophosphate from hypoxanthine and phosphoribosyl pyrophosphate (PRPP), with  
401 production of the latter stimulated by NUDT5. 6-TG can substitute for hypoxanthine,  
402 ultimately yielding altered nucleotides that are toxic upon incorporation into DNA<sup>40</sup>. PRPP is  
403 still required, so low NUDT5 expression could possibly induce 6-TG resistance. This is  
404 consistent with our NCI-60 data and recent experimental work showing that depletion of  
405 NUDT5 confers resistance to 6-TG<sup>41</sup>. As noted in **Fig. 5A**, a metabolite of 6-TG,  
406 thioguanosine monophosphate (TGMP) can be inactivated by methylation. Production of the  
407 methyl group donor, S-adenosylmethionine (SAME), is catalyzed by the methionine  
408 adenosyltransferase II $\alpha$  (MAT2A) enzyme. The MAT2B protein, exhibiting high correlation  
409 with MAT2A (**Fig. 5D**), is a regulatory component of MAT which may enhance feedback  
410 inhibition by SAME<sup>42</sup>. Increased MAT inhibition and diminished TGMP methylation may  
411 shunt more TGMP toward DNA incorporation, enhancing the 6-TG response. In spite of its  
412 relatively low cross-validation accuracy, the presented model may provide a starting point for  
413 further exploration, in light of the supporting prior research.

414

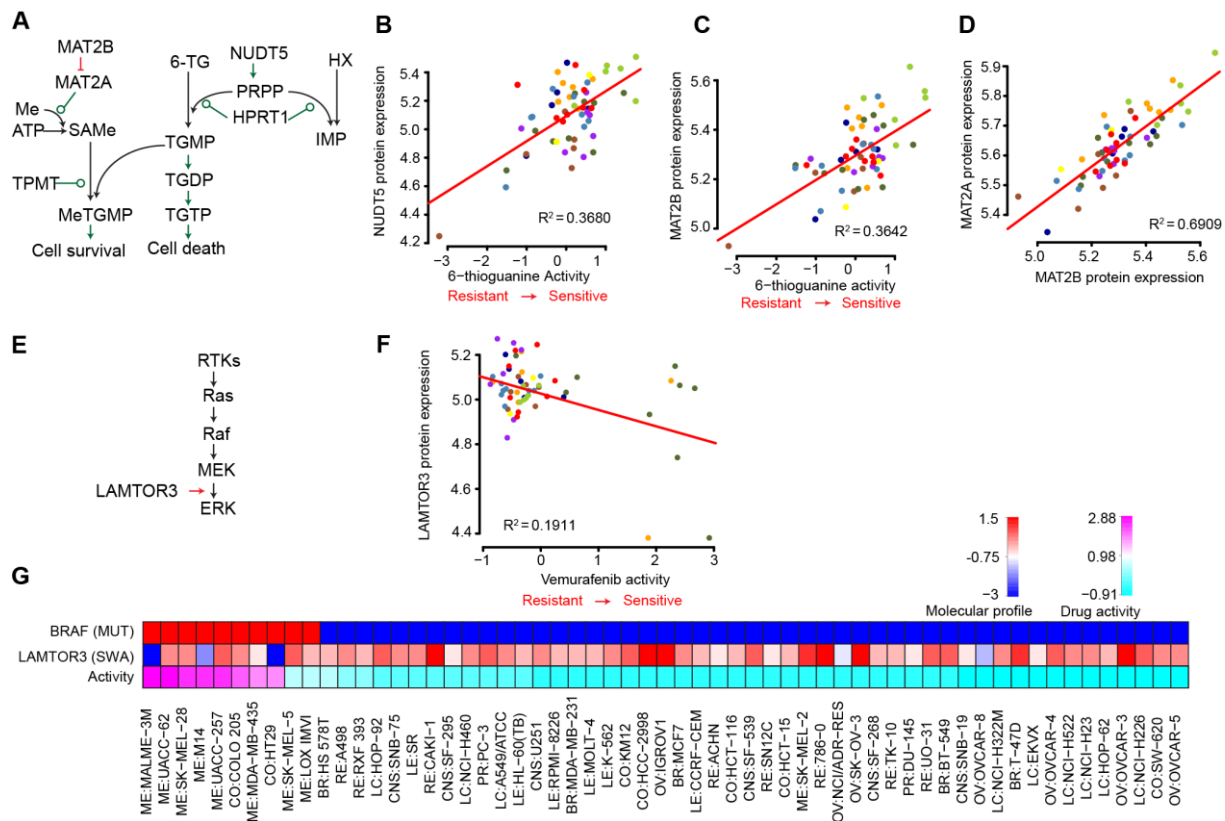

415

416 **Figure 5. Drug responsiveness predicted by SWATH data. (A)** molecular mechanisms of 6-TG. **(B)**  
 417 correlation between NUDT5 protein expression and 6-TG activity. **(C)** correlation between MAT2B protein  
 418 expression and 6-TG activity. **(D)** correlation between MAT2B and MAT2A protein expression. **(E)**  
 419 LAMTOR3 facilitates MEK/ERK pathway activation by binding MEK and ERK. **(F)** correlation between  
 420 LAMTOR3 protein expression and Vemurafenib activity. **(G)** Association of BRAF mutation and LAMTOR3  
 421 protein expression with Vemurafenib activity.

422

423 Analysis of the protein kinase inhibitor vemurafenib (NSC 761431) yielded a  
 424 multivariate model based on BRAF V600E activating mutation status<sup>43</sup> and the protein  
 425 expression level of LAMTOR3. LAMTOR3 (MP1) is part of an endosomal scaffolding  
 426 complex that interacts with components of the RAF/MEK/ERK mitogenic signaling pathway  
 427 (**Fig. 5E**). In particular, LAMTOR3 binds MEK1 and ERK1, facilitating activation of the  
 428 latter protein<sup>44</sup>. Elevated LAMTOR3 protein expression was correlated with vemurafenib  
 429 resistance ( $r = 0.44$ , **Fig. 5F**), consistent with the hypothesis that LAMTOR3 has the capacity  
 430 to enhance RAF/MEK/ERK pathway signaling downstream from RAF. In particular,  
 431 increased protein expression of LAMTOR3 was observed in two BRAF mutant cell lines,  
 432 ME:SK-MEL-5 and ME:LOXIMVI, which are relatively resistant to Vemurafenib (**Fig. 5G**).  
 433 Due to the limited number of BRAF mutant cell lines exhibiting relative drug resistance (*i.e.* 2  
 434 cell lines), additional statistical analyses with sufficient power are not possible. Robust  
 435 statistical validation of this model may possible when larger cell line databases (e.g. the

436 Sanger and Broad resources) expand to include proteomic coverage of LAMTOR3. Still, this  
437 finding remains relevant in light of the recent research into the activity of LAMTOR3,  
438 including the observation that reduced LAMTOR3 protein levels decreased the activation of  
439 MEK1/2 and ERK1/2 <sup>44,45</sup>. Additionally, LAMTOR3 has been shown to affect proliferation  
440 of pancreatic and breast cancers <sup>46,47</sup>, and has been patented as a diagnostic biomarker for  
441 breast cancer <sup>47</sup>.

442

443 Our elastic net analysis also produced multiple recurrent predictors with plausible drug  
444 response associations. ABCC4 was a negatively weighted predictor for several alkylating  
445 agents, including chlorambucil (NSC: 3088), uracil mustard (NSC: 34462), nitrogen mustard  
446 (NSC: 762), consistent with its established role as a drug efflux pump <sup>48</sup>. Another recurrent,  
447 negatively-weighted predictor was CTNND1, which was identified for several compounds,  
448 including bendamustine (NSC: 138783), etoposide (NSC: 141540), valrubicin (NSC:  
449 246131), and carmustine (NSC: 409962). CTNND1 encodes delta-catenin, whose  
450 overexpression promotes cell survival through activation of Wnt pathway signaling <sup>49</sup>. The  
451 resulting inhibition of apoptosis <sup>50</sup> could plausibly confer resistance to the mentioned DNA-  
452 damage inducing drugs.

453

## 454 **Discussion**

455

456 Due to the complementarity of protein and transcript data <sup>4-6,51</sup>, it can be expected that  
457 the rapid and consistent quantification of thousands of proteins across a large sample cohort  
458 will reveal new biological information that is not apparent from the commonly used transcript  
459 profiles. However, due to technical limitations, such proteomic cohort datasets have been  
460 challenging to acquire. Here, using the NCI-60 cell line compendium, we demonstrate the  
461 ability of the PCT-SWATH proteomic technique to consistently quantify in excess of 3000  
462 proteins across the 60 cell lines measured in duplicate. The data were acquired in 30 working  
463 days on a single mass spectrometer and for each sample measurement ca. 1 microgram of  
464 total peptide mass was consumed. This has been enabled by the pressure cycling technology  
465 which minimizes samples consumption and the data-independent MS data acquisition using  
466 SWATH-MS <sup>7</sup>. The data generated and their use to reveal cancer biology and drug response  
467 determinants represent a significant advance in the field.

468

469           The proteome of the NCI-60 cells has been previously measured by extensive sample  
470 fractionation and DDA-MS analysis of over 1,000 fractionated samples<sup>17</sup>. In this study, data  
471 acquisition for each cell line required an average of about 29.16 hours MS instrument time.  
472 That shotgun proteomics study reported the cumulative identification of 10,350 IPI proteins  
473 over the NCI-60 cell lines. However, only 492 proteins were quantified in all cell lines  
474 without missing value. The PCT-SWATH methodology adopted in this study offers an over  
475 10-fold increase in sample-throughput, which has allowed us to acquire the proteotype for  
476 each cell in the NCI-60 panel in duplicate, with standardized sample preparation, within 30  
477 working days. In addition, our data have 0.1% amount of missing values at protein level  
478 owing to the data acquisition strategy and improvements in bioinformatics analysis. This  
479 study demonstrates that the human proteotype can be obtained with a throughput comparable  
480 to genomic and transcriptomic analyses, though still at relatively lower coverage.

481

482           Two aspects of our workflow ensure robust and quantitatively accurate protein  
483 expression measurements. First, we obtained technical duplicates for the entire set of NCI-60  
484 proteotypes, which was feasible due to the unparalleled high sample-throughput of the PCT-  
485 SWATH methodology which is now gaining popularity in proteomic profiling of clinical  
486 specimens. In addition, we developed an expert system software (manuscript in preparation)  
487 to further curate peptide and protein identification and quantification. Applying stringent  
488 criteria, 3,171 proteins were included for further analyses. The raw MS signal for each of  
489 these quantified proteins, in each cell line, was inspected by the expert system, simulating  
490 manual inspection, and is available for visual inspection in the supplementary data. We further  
491 compared the expression of a few proteins with known expression in certain cell lines,  
492 obtaining good agreement. Nevertheless, we cannot conclude that the peptides and proteins  
493 that failed to pass curation by the expert system are not biological signals, due to the  
494 unpredictable degree of biological heterogeneity, and the fact that we did not analyze non-  
495 canonical peptide variants and post-translational modification. The latter can be potentially  
496 dissected and quantitated by future *in silico* analyses of our SWATH maps. Since the NCI-60  
497 cell lines are widely used in cell biology, we anticipate broad utility of this highly curated  
498 proteomic data. Additionally, our rapid proteotype acquisition pipeline using PCT-SWATH  
499 requires little biological material, making it suitable for clinical settings and in precision  
500 medicine efforts<sup>7, 8, 52</sup>.

501

502 Compared to other omics data, the proteotypes obtained here offered unique insights  
503 into the coordinated expression of protein complexes. Interactions amongst their component  
504 subunits contribute to our understanding of protein function, as well as human diseases<sup>24, 53-</sup>  
505 <sup>55</sup>. Several protein complexes have been identified as biomarkers of disease, including cancer  
506 progression<sup>56</sup>. Our high quality proteomic data allowed systematic investigation of the  
507 composition of 101 protein complexes in 60 cell lines. We expect that this represents a proof-  
508 of-principle for a generic, high-throughput approach, applicable to clinical specimens<sup>7</sup>, for  
509 exploring the association between protein complexes and biological/disease phenotypes.

510

511 The NCI-60 continues to enable important contributions that have come and continue  
512 to come from this resource, and often emerging technologies are first tested on this cell line  
513 panel due to its diversity and depth of surrounding knowledge<sup>3, 12, 57-59</sup>. Each cancer cell line  
514 in the NCI-60 has been tested against tens of thousands of compounds, including the 240  
515 FDA-approved and investigational drugs featured in our analyses. With the addition of the  
516 SWATH proteomic data, the NCI-60 remains positioned as one of most comprehensive  
517 models for cancer research and drug discovery<sup>12, 15</sup>. It uniquely enabled our thorough,  
518 integrative analysis of different molecular profiles (genomic, transcriptomic, and proteomic)  
519 in predicting drug responsiveness. Our findings strengthen the body of work highlighting the  
520 importance of integrative omic approaches in understanding drug mechanisms and establish  
521 the benefit of large-scale proteomic measurements. Therefore, we expect this work to become  
522 a seminal work in the area of pharmacoproteomics, the benefit of which will grow with  
523 anticipated expansion of sample size, proteomic coverage, including extension to  
524 phosphoproteomic expression, as well as extension to mouse models<sup>60</sup> and human specimens  
525 <sup>7</sup>.

526

527 The existing SWATH data specifically enabled the use of advanced analysis  
528 techniques to produce multivariate models of drug response. Great effort was put into making  
529 our work accessible to a large audience through data submission to the NCI-60 CellMiner  
530 database and availability through an accompanying R package, rcellminer. We expect this  
531 pipeline based on the widely used elastic net method will continue to evolve and enable future  
532 studies on additional data sets and phenotypes. And while the strengths of the elastic net  
533 method over other related methods have been previously described<sup>61, 62</sup>, the resulting models  
534 still require careful scrutiny by individual researchers. The interpretation of the models  
535 developed here, and by others using our pipeline, should be guided by understanding of the

536 biological activities of the associated predictors in the context of the mechanisms of action for  
537 the input drugs. From the models generated by the current analyses, we identified several  
538 potential determinants of drug responses, including NUDT5 and MAT2B protein levels for  
539 the antimetabolite 6-TG, as well as complementary markers, such as LAMTOR3 protein  
540 levels in conjunction with BRAF mutational status for Vemurafenib and other BRAF  
541 inhibitors. These determinants may provide clinically relevant insights toward understanding  
542 mechanisms of resistance to these and other agents. Together, these results invite further  
543 investigation of this unique proteomic data resource. For example, in the current study's  
544 analysis of protein complexes, we identified discrepancies between data at the transcriptomic  
545 and proteomic levels. This observation has been similarly made in tumor samples, with  
546 additional variation across tissue types<sup>63</sup>. These differences can be used in future studies to  
547 develop drug response models with non-redundant predictor sets including both data types.  
548 However, due to the tissue diversity of the NCI-60 cells and the limited number of cell lines,  
549 data from more cancer cell lines of specific tissue type and extension to clinical specimens are  
550 required to advance our findings to clinical applications.

551

## 552 **Acknowledgements**

553 We thank Margot Sunshine who developed CellMiner and the NCI-DTP team (Dr.  
554 Jerry Collins and Dr. James H. Doroshow) for the drug data and support for data acquisition,  
555 Emanuel Gonçalves for comments to the manuscript. The work was supported by the  
556 SystemsX.ch project PhosphoNetX PPM (to R.A.), the Swiss National Science Foundation  
557 (grant no. 3100A0-688 107679 to R.A.), the European Research Council (grants no. ERC-  
558 2008-AdG 233226 and ERC-2014AdG 670821 to R.A.), European Union's Horizon 2020  
559 research and innovation programme under grant agreement No 668858 (to R.A., J.S.-R., L.C.,  
560 P.W.), the Ruth L. Kirschstein National Research Service Award (grant no. F32 CA192901 to  
561 A.L.), the National Resource for Network Biology (NRNB) from the National Institute of  
562 General Medical Sciences (NIGMS) (grant no. P41 GM103504 to C.S.), and the Center for  
563 Cancer Research, Intramural Program of the National Cancer Institute (grant no. Z01  
564 BC006150 to Y.P), and the Wellcome Trust Award (102696) to M.J.G.. We thank An Guo for  
565 help in preparing the graphics.

566

## 567 **Author contributions**

568 T.G. designed and coordinated the project with supervision from R.A. C.C.K.  
569 processed the samples. L.G., C.C.K. and T.G. acquired the SWATH data. T.G. performed the

570 SWATH data interpretation and benchmarking with help from C.C.K., and the expert system  
571 analysis with help from U.S. A.L., V.N.R. and Z.W. performed the drug response prediction  
572 analysis, and developed the reproducible research infrastructure, with critical inputs from  
573 M.P.M., J.S.R., M.J.G., S.V., W.C.R., C.S., and Y.P.. L.C. and L.M. performed the pathway  
574 analysis. A.L., V.N.R., W.C.R. and S.V. integrated the SWATH data into rcellminer and  
575 CellMiner. A.O., M.I. and R.C. performed the protein complex analysis, with help from A.L.,  
576 Z.W., Y.C., V.N.R, C.S., Y.S., Y.Z., Y.P.. P.Q. and Q.Z. contributed to the data analysis.  
577 T.G., A.L. and V.N.R. wrote the manuscript with inputs from all co-authors. P.J.W., P.B.,  
578 M.R., J.S.R., W.C.R., C.S., Y.P. and R.A. supervised the project.

579

### 580 **Competing financial interests**

581 R.A. holds shares of Biognosys AG, which operates in the field covered by the article.  
582 The research group of R.A. is supported by SCIEEX, which provides access to prototype  
583 instrumentation, and Pressure Biosciences, which provides access to advanced sample  
584 preparation instrumentation.

585

586

## 587 **Materials and Methods**

588

### 589 **PCT-assisted sample preparation for MS analyses**

590

591 The NCI-60 cells were obtained as frozen, non-viable cell pellets from the  
592 Developmental Therapeutics Program (DTP), National Cancer Institute (NCI-NIH) and  
593 processed using Barocycler® NEP2320 (PressureBioSciences Inc, South Easton, MA). The  
594 IDs of the NCI-60 cells in our study matching to the IDs in Cellminer and a previous  
595 proteomic study by the Kuster group are provided in **Supplementary Table 1**. Briefly, cell  
596 pellets were lysed in a buffer containing 8M urea, 0.1M ammonium bicarbonate, and  
597 Complete™ protease inhibitor using barocycler program (20 seconds 45 kpsi, 10 seconds 0  
598 kpsi, 120 cycles) at 35°C<sup>7</sup>. Whole cell lysates were sonicated for 25 seconds with 1 min  
599 interval on ice for 3 times. Cellular debris was removed by centrifugation and sample protein  
600 concentration was determined by BCA assay prior to protein reduction with 10 mM TCEP for  
601 20 min at 35°C, and alkylation with 40 mM iodoacetamide in the dark for 30 min at room  
602 temperature. Lys-C digestion (1/50, w/w) was performed in 6 M urea using PCT program (25  
603 seconds 25 kpsi, 10 seconds 0 kpsi 75 cycles) at 35°C; whereas trypsin digestion (1/30, w/w)  
604 was performed in further diluted urea (1.6M) using PCT program (25 seconds 25 kpsi, 10  
605 seconds 0 kpsi, 160 cycles) at 35°C. Digestion was stopped by acidification with  
606 trifluoroacetic acid to a final pH of around 2 before C18 column desalting using SEP-PAK  
607 C18 cartridges (Waters Corp., Milford, MA, USA).

608

### 609 **Off-gel electrophoresis**

610

611 To create a comprehensive spectral library for SWATH-MS analysis, we pooled 20-  
612 40% of desalted peptide solutions from each NCI-60 sample and performed off-gel  
613 fractionation. Briefly, pooled peptides were resolubilised in OGE buffer containing 5% (v/v)  
614 glycerol, 0.7% (v/v) acetonitrile (ACN) and 1% (v/v) carrier ampholytes mixture (IPG buffer  
615 pH 3.0-10.0, GE Healthcare). Fractionation was performed on a 3100 OFFGEL (OGE)  
616 Fractionator (Agilent Technologies) using a 24 cm pH3-10 IPG strip (Immobilised pH  
617 Gradient strip from GE Healthcare) according to manufacturer's instructions using a program  
618 of 1 h rehydration at a maximum of 500 V, 50 µA and 200 mW followed by separation at a  
619 maximum of 8000 V, 100 µA and 300 mW until 50 kVh were reached. Each of 24 fraction  
620 was recovered and cleaned up by C18 reversed-phase MicroSpin columns (The Nest Group



621 Inc.). Based on the sample complexity (based on Nanodrop, A280 measurement), for each  
622 strip, the following fractions were pooled into 12 samples for MS injections: pool 1 (fraction  
623 1-2), pool 2 (fraction 3), pool 3 (fraction 4), pool 4 (fraction 5), pool 5 (fraction 6-7), pool 6  
624 (fraction 8-9), pool 7 (fraction 10-11), pool 8 (fraction 12-15), pool 9 (fraction 16-19), pool 10  
625 (fraction 20-21), pool 11 (fraction 22), pool 12 (fraction 23-24). Those were injected in  
626 quadruplicate, resulting in 48 DDA injections of fractionated samples.

627

## 628 **DDA MS for spectral library generation**

629

630 For spectral library generation, a SCIEX TripleTOF 5600 System mass spectrometer  
631 was operated essentially as described before <sup>64</sup>: all samples were analyzed on an Eksigent  
632 nanoLC (AS-2/1Dplus or AS-2/2Dplus) system coupled with a SWATH-MS-enabled AB  
633 SCIEX TripleTOF 5600 System. The HPLC solvent system consisted of buffer A (2% ACN  
634 and 0.1% formic acid, v/v) and buffer B (95% ACN with 0.1% formic acid, v/v). Samples  
635 were separated in a 75  $\mu\text{m}$  diameter PicoTip emitter (New Objective) packed with 20 cm of  
636 Magic 3  $\mu\text{m}$ , 200A C18 AQ material (Bischoff Chromatography). The loaded material was  
637 eluted from the column at a flow rate of 300  $\text{nL min}^{-1}$  with the following gradient: linear 2 -  
638 35% B over 120 min, linear 35 - 90% B for 1 min, isocratic 90% B for 4 min, linear 90 - 2%  
639 B for 1 min and isocratic 2% solvent B for 9 min. The mass spectrometer was operated in  
640 DDA mode using a top20 method, with 500 ms and 150 ms acquisition time for the MS1 and  
641 MS2 scans respectively, and 20 s dynamic exclusion for the fragmented precursors. Rolling  
642 collision energy using the following equation ( $0.0625 \times m/z - 3.5$ ) with a collision energy  
643 spread of 15 eV was used for fragmentation regardless of the charge state of the precursors, to  
644 mimic as close as possible the fragmentation conditions of the precursors in SWATH-MS  
645 mode. Altogether, we had 66 DDA-MS injections, including the 48 OGE samples and another  
646 18 pooled peptide samples from the unfractionated cell lysate of the NCI-60 cells.

647

## 648 **Spectral and assay library generation**

649

650 All raw instrument data were centroided using Proteowizard msconvert (version 2.0).  
651 The assay library was generated using an established protocol <sup>64</sup>. In short, the shotgun data  
652 sets were searched individually using X!Tandem <sup>65</sup> (2011.12.01.1) with k-score plugin <sup>66</sup>,  
653 Myrimatch <sup>67</sup> (2.1.138), OMSSA <sup>68</sup> (2.1.8) and Comet <sup>69</sup> (2013.02r2) against the reviewed  
654 UniProtKB/Swiss-Prot (2014\_02) protein sequence database containing 20,270 proteins

655 appended with 11 iRT peptides and decoy sequences. Carbamidomethyl was used as a fixed  
656 modification and oxidation as the variable modification. Maximally two missed cleavages  
657 were allowed. Peptide mass tolerance was set to 50 ppm, fragment mass error to 0.1 Da. The  
658 search identifications were combined and statistically scored using PeptideProphet <sup>70</sup> and  
659 iProphet <sup>71</sup> available within the Trans-Proteomics Pipeline (TPP) toolset (version 4.7.0) <sup>72</sup>.  
660 MAYU <sup>73</sup> (v. 1.07) was used to determine the iProphet cutoff (0.999354) corresponding to a  
661 protein FDR of 1.03%. SpectraST was used in library generation mode with CID-QTOF  
662 settings and iRT normalisation at import against the iRT Kit <sup>74</sup> peptide sequences (-  
663 c\_IRTirt.txt -c\_IRR) and a consensus library was consecutively generated. An in-house  
664 python script, spec-trast2tsv.py31 (msproteomicstools 0.2.2) was then used to generate the  
665 assay library with the following settings: -l 350,2000 -s b,y -x 1,2 -o 6 -n 6 -p 0.05 -d -e -w  
666 swath32.txt -k openswath (fragment ions between 350 and 2000 m/z, b and y ions authorized,  
667 fragment charges 1+ and 2+, 6 most intense transitions, precision of fragment ion retrieved  
668 0.05 Da, exact fragment ion mass calculated, exclude fragments in the swath window). The  
669 OpenSWATH tool, ConvertTSVToTraML converted the TSV file to TraML format; Open-  
670 SwathDecoyGenerator generated the decoy assays in shuffle mode and appended them to the  
671 TraML assay library. In this study, we built a SWATH assay library containing 86,209  
672 proteotypic peptide precursors in 8,056 proteotypic SwissProt proteins. This library is  
673 supplied in PRIDE project PXD003539.

674

## 675 **SWATH-MS**

676

677 The SWATH-MS data acquisition in a Sciex TripleTOF 5600 mass spectrometer was  
678 performed as described before <sup>10</sup>, using 32 windows of 25 Da effective isolation width (with  
679 an additional 1 Da overlap on the left side of the window) and with a dwell time of 100 ms to  
680 cover the mass range of 400 - 1200 *m/z* in 3.3 s. The collision energy for each window was set  
681 using the collision energy of a 2+ ion centered in the middle of the window (equation:  $0.0625$   
682  $\times m/z - 3.5$ ) with a spread of 15 eV. The sequential precursor isolation window setup was as  
683 follows: [400-425], [424-450], [449-475], ..., [1174-1200].

684

## 685 **Protein identification using OpenSWATH**

686

687 We analyzed the SWATH data using OpenSWATH software <sup>11</sup> using parameters as  
688 described previously <sup>24</sup>. We identified 48,374 peptides from 6,556 protein groups from the

689 NCI-60 panel with < 1% false discovery rate at both peptide and protein level evaluated by  
690 OpenSWATH<sup>11</sup> and Mayu<sup>75</sup> (supplied in PRIDE project PXD003539).

691

## 692 **DIA-expert analyses**

693

694 The DIA-expert software read OpenSWATH output result file which contains  
695 statistical scores (*i.e.* mProphet score or mScore) indicating the confidence of identification  
696 for each peptide precursor in each sample, and from there selected the sample in which a  
697 peptide precursor was identified with highest confidence. It then obtained extracted ion  
698 chromatograms (XICs) for the target peptide precursor and all associated annotated *b* and *y*  
699 fragments in the reference sample, and refined fragments based on the peak shape of each  
700 fragment and its peak boundary. The refined fragments and precursor XIC traces from each of  
701 the rest samples were subsequently compared with the reference peak group using empirical  
702 expert rules, based on which the best matched peak group in each sample was picked and  
703 visualized. Duplicated measurements were used to evaluate the accuracy of peptide and  
704 protein quantification. The protein quantity was normalized based on total ion  
705 chromatography of the MS1 spectra from each raw SWATH file. All codes are provided in  
706 Github <https://github.com/tiannanguo/dia-expert>.

707

## 708 **Protein complexes analysis**

709

710 For this analysis, technical replicates were averaged to generate the NCI-60  
711 proteotypes. To assess the coverage of protein complexes by NCI-60 proteotypes, we  
712 retrieved a large resource of mammalian protein complexes assembled from CORUM<sup>76</sup>,  
713 COMPLEAT<sup>77</sup> and literature-curated complexes<sup>24,78</sup>. This resource contains 2,041 proteins  
714 as members of 279 distinct complexes and it is available at <http://variablecomplexes.embl.de/>.  
715 101 complexes were represented in the NCI-60 proteotypes with at least 5 members  
716 quantified. These complexes, in total, contain 1,045 distinct proteins quantified in the NCI-60  
717 proteotypes. Pearson's correlation coefficient was calculated for all the pairwise comparisons  
718 of 3,171 proteins across the NCI-60 cell lines. All pairwise comparisons were classified into  
719 two categories: either two proteins were members of the same complex or not. Average  
720 abundance, standard deviation and average Pearson correlation of each complex were  
721 calculated based on the abundance of complex members in the NCI-60 proteotypes.

722

723 For this analysis, technical replicates were averaged to generate the NCI-60  
724 proteotypes. To assess the coverage of protein complexes by NCI-60 proteotypes, we  
725 retrieved a large resource of mammalian protein complexes assembled from CORUM <sup>76</sup>,  
726 COMPLEAT <sup>77</sup> and literature-curated complexes <sup>24,78</sup>. This resource contains 2041 proteins  
727 as members of 279 distinct complexes and it is available at <http://variablecomplexes.embl.de/>.  
728 158 complexes were represented in the NCI-60 proteotypes with at least 5 members  
729 quantified. These complexes, in total, contain 1,045 distinct proteins quantified in the NCI-60  
730 proteotypes. Pearson's correlation coefficient was calculated for all the pairwise comparisons  
731 of 3,171 proteins across the NCI-60 cell lines. All pairwise comparisons were classified into  
732 two categories: either two proteins were members of the same complex or not. Average  
733 abundance and standard deviation of each complex were calculated based on the mean  
734 abundance of complex members in the NCI-60 proteotypes.

735

### 736 **Pathway activity analysis**

737

738 The activity of pathways, as they are described in ACSN, has been computed using  
739 ROMA <sup>32</sup>. Among all the modules defined in ACSN, only 11 show a significant dispersion  
740 over the data set: AKT\_MTOR, HR (Homologous Recombination), NER (nucleotide  
741 Excision Repair), TNF response, Death Receptors regulators, Apoptosis, caspases, E2F3 and  
742 E2F4 targets, HIF1 and cytoskeleton polarity. For these modules, the mean activity score for  
743 each type of cancer cell lines was computed and mapped onto the atlas (from bright green for  
744 low values to bright red for high values). To assess module differential activity between  
745 proteotypes, we computed a *t*-test on the activity scores in cell lines of a cancer type versus  
746 the activity of all other cancer cell lines. The definition of genes composing each module can  
747 be found in <http://acsn.curie.fr>

748

749

### 750 **Drug sensitivity prediction using elastic net**

751

752 The elastic net regularized regression algorithm was applied to predict drug response  
753 for 240 FDA-approved or investigational NSC-designated compounds. Some widely studied  
754 drugs are represented by more than one NSC identifier, with each identifier associated with a  
755 distinct compound sample and series of NCI-60 drug activity assays. For each compound, 7  
756 combinations of input data were evaluated. These included NCI-60 mRNA expression, gene-

757 level mutation, and SWATH-MS protein expression, both alone and in all possible  
758 combinations. mRNA expression data was available for 14,969 genes, and derived from  
759 CellMiner , with missing values imputed using the impute.knn function (with default  
760 parameters) of the Bioconductor impute package. Gene-level mutation profiles were  
761 available for 2,282 genes, and were obtained from CellMiner exome sequencing data, with  
762 values indicating the percent conversion to a variant form for the case of expected function-  
763 impacting alterations (frameshift, nonsense, splice-sense, missense mutations by  
764 SIFT/PolyPhen2 analysis). SWATH-MS based protein expression data was available for  
765 3,171 proteins.

766  
767 Elastic net analysis was done using the glmnet R package <sup>79</sup>. The elastic net analysis  
768 was conducted using a multi-step pipeline involving cross-validations performed in a nested  
769 manner. The “outer” cross-validation is a leave-one-out cross validation that is conducted  
770 over all computational steps present in the “inner” pipeline, and it is used to validate model  
771 performance. The “inner” cross-validation are conducted to select elastic net hyperparameters  
772 (alpha and lambda) and for predictor set trimming, using data from a set of ~59 cell lines.

773  
774 The elastic net parameters alpha and lambda were selected by minimizing the cross-  
775 validation error (average of 10 replicates of 10-fold cross-validation) within the “inner”  
776 pipeline. The selected alpha and lambda parameters were then applied to 200 runs of the  
777 elastic net algorithm, each using a random data subset derived from 90% of the available cell  
778 lines. The 200 resulting coefficient vectors were then averaged, and predictors were ranked by  
779 the magnitude of their average coefficient weight. To select a limited number of predictors  
780 with potential to generalize to new data, top k-element predictor sets (by average coefficient  
781 weight magnitude) were evaluated using standard linear regression and 10-fold cross-  
782 validation. The appropriate k was set to the smallest value yielding a cross-validation error  
783 within one standard deviation of the minimum cross-validation error.

784  
785 To obtain a robust estimate of performance on unseen data, leave-one-out cross-  
786 validation was applied to the overall procedure as part of the “outer” pipeline. Specifically,  
787 drug response for each cell line was predicted using an elastic net model derived using the  
788 remaining held out data (and the steps outlined above). The vector of predicted response  
789 values was then correlated with the actual response values, with the Pearson’s correlation

790 coefficient providing an estimate of the predictive value of the applied input data  
791 combination. More details of the elastic net algorithm are provided in File S3.

792  
793 Elastic net analysis was done using the rcellminerElasticNet R package  
794 ([https://bitbucket.org/cbio\\_mskcc/rcellminerelasticnet](https://bitbucket.org/cbio_mskcc/rcellminerelasticnet)), which facilitates the application of the  
795 glmnet R package (which provides the elastic net algorithm code) to data from the rcellminer  
796 and rcellminerData packages<sup>80</sup>. rcellminerElasticNet also provides utility functions for  
797 summarizing and visualizing elastic net results.

798  
799 Results for the elastic net analysis are available from this URL:  
800 [https://discover.nci.nih.gov/cellminerreviewdata/swath\\_analysis/swathOutput\\_062316\\_all.tar.](https://discover.nci.nih.gov/cellminerreviewdata/swath_analysis/swathOutput_062316_all.tar.gz)  
801 [gz](https://discover.nci.nih.gov/cellminerreviewdata/swath_analysis/swathOutput_062316_all.tar.gz). This compressed file contains results for the analysis run with all features and selected  
802 common features. Each drug compound has three files for each combination of molecular  
803 features used in a particular run of the elastic net algorithm: 1) a knitr report R Markdown  
804 (.Rmd) file containing the code that was run, 2) an RData (.Rdata) file containing the results  
805 of each elastic net run (see elasticNet() documentation in the rcellminerElasticNet package),  
806 3) the rendered knitr report as a webpage (.html).

807  
808 Beyond the knitr report containing code, the elastic net pipeline is made reproducible  
809 using a Docker image. Docker ([www.docker.com](http://www.docker.com)) is an emerging platform for conducting  
810 reproducible research in the biomedical research community. All necessary software and  
811 dependencies to run the described analysis have been embedded in the available Docker  
812 container to provide readers an environment that runs on all major operating systems  
813 (including Windows, OSX, and Linux), making Docker containers self-contained, portable,  
814 and capable of performing at levels similar to the host system.

815  
816 The Docker container is available at the Docker Hub repository: [cannin/swath](https://hub.docker.com/r/cannin/swath)  
817 (<https://hub.docker.com/r/cannin/swath/>). Key dependencies installed, include: RStudio  
818 Server (<https://www.rstudio.com/>), rcellminer/rcellminerData<sup>80</sup>, and rcellminerElasticNet.  
819 With these installed dependencies, readers have the opportunity to 1) re-run analysis for  
820 specific drug compounds and modify the code in order to extend the analysis using RStudio  
821 Server, a web-based version of the RStudio R editor, and 2) use an R Shiny app web-based  
822 data explorer to further understand described results. Instructions on the usage of the Docker

823 container are located at the rcellminerElasticNet project page  
824 ([https://bitbucket.org/cbio\\_mskcc/rcellminerelasticnet](https://bitbucket.org/cbio_mskcc/rcellminerelasticnet)).

825

## 826 **Data deposition**

827

828 The NCI-60 SWATH data sets and SWATH assay library has been deposited in  
829 PRIDE. Project Name: NCI60 proteome by PCT-SWATH; Project accession: PXD003539.

830 Reviewer account details:

831 Username: reviewer15254@ebi.ac.uk

832 Password: dWdyptzf

833 The protein data matrix has also been deposited in ArrayExpress. Project accession: E-  
834 PROT-2. Project title: Proteomic profiling of NCI60 cell lines from Cancer Cell Line  
835 Encyclopedia.

836 Reviewer account details:

837 Username: Reviewer\_E-PROT-2

838 Password: gdgywGco

839 The protein data matrix is also accessible in CellMiner website <sup>13</sup> and R package  
840 rcellminer <sup>37</sup>.

841

## 842 **References**

843

- 844 1. Cancer Genome Atlas Research, N. et al. The Cancer Genome Atlas Pan-Cancer analysis  
845 project. *Nat Genet* **45**, 1113-1120 (2013).
- 846 2. Barretina, J. et al. The Cancer Cell Line Encyclopedia enables predictive modelling of  
847 anticancer drug sensitivity. *Nature* **483**, 603-607 (2012).
- 848 3. Garnett, M.J. et al. Systematic identification of genomic markers of drug sensitivity in cancer  
849 cells. *Nature* **483**, 570-575 (2012).
- 850 4. Zhang, B. et al. Proteogenomic characterization of human colon and rectal cancer. *Nature*  
851 **513**, 382-387 (2014).
- 852 5. Mertins, P. et al. Proteogenomics connects somatic mutations to signalling in breast cancer.  
853 *Nature* **534**, 55-62 (2016).
- 854 6. Zhang, H. et al. Integrated Proteogenomic Characterization of Human High-Grade Serous  
855 Ovarian Cancer. *Cell* (2016).
- 856 7. Guo, T. et al. Rapid mass spectrometric conversion of tissue biopsy samples into permanent  
857 quantitative digital proteome maps. *Nat Med* (2015).
- 858 8. Shao, S. et al. Minimal sample requirement for highly multiplexed protein quantification in  
859 cell lines and tissues by PCT-SWATH mass spectrometry. *Proteomics* (2015).
- 860 9. Powell, B.S., Lazarev, A.V., Carlson, G., Ivanov, A.R. & Rozak, D.A. Pressure cycling technology  
861 in systems biology. *Methods Mol Biol* **881**, 27-62 (2012).
- 862 10. Gillet, L.C. et al. Targeted data extraction of the MS/MS spectra generated by data-  
863 independent acquisition: a new concept for consistent and accurate proteome analysis.  
864 *Molecular & cellular proteomics : MCP* **11**, O111 016717 (2012).
- 865 11. Rost, H.L. et al. OpenSWATH enables automated, targeted analysis of data-independent  
866 acquisition MS data. *Nat Biotechnol* **32**, 219-223 (2014).
- 867 12. Shoemaker, R.H. The NCI60 human tumour cell line anticancer drug screen. *Nat Rev Cancer*  
868 **6**, 813-823 (2006).
- 869 13. Reinhold, W.C. et al. CellMiner: A Web-Based Suite of Genomic and Pharmacologic Tools to  
870 Explore Transcript and Drug Patterns in the NCI-60 Cell Line Set. *Cancer Res* **72**, 3499-3511  
871 (2012).
- 872 14. Fojo, T. et al. Identification of non-cross-resistant platinum compounds with novel  
873 cytotoxicity profiles using the NCI anticancer drug screen and clustered image map  
874 visualizations. *Crit Rev Oncol Hematol* **53**, 25-34 (2005).
- 875 15. Holbeck, S.L., Collins, J.M. & Doroshow, J.H. Analysis of Food and Drug Administration-  
876 approved anticancer agents in the NCI60 panel of human tumor cell lines. *Mol Cancer Ther* **9**,  
877 1451-1460 (2010).
- 878 16. Bates, S.E. et al. Romidepsin in peripheral and cutaneous T-cell lymphoma: mechanistic  
879 implications from clinical and correlative data. *Br J Haematol* **170**, 96-109 (2015).
- 880 17. Gholami, A.M. et al. Global Proteome Analysis of the NCI-60 Cell Line Panel. *Cell Rep* **4**, 609-  
881 620 (2013).
- 882 18. Picotti, P. & Aebersold, R. Selected reaction monitoring-based proteomics: workflows,  
883 potential, pitfalls and future directions. *Nat Methods* **9**, 555-566 (2012).
- 884 19. Law, V. et al. DrugBank 4.0: shedding new light on drug metabolism. *Nucleic Acids Res* **42**,  
885 D1091-1097 (2014).
- 886 20. Uhlen, M. et al. Proteomics. Tissue-based map of the human proteome. *Science* **347**,  
887 1260419 (2015).
- 888 21. Lin, J.L. et al. MST4, a new Ste20-related kinase that mediates cell growth and transformation  
889 via modulating ERK pathway. *Oncogene* **20**, 6559-6569 (2001).
- 890 22. Huang, C.L., Cha, S.K., Wang, H.R., Xie, J. & Cobb, M.H. WNKs: protein kinases with a unique  
891 kinase domain. *Exp Mol Med* **39**, 565-573 (2007).



- 892 23. Xu, H. et al. Epidermal growth factor receptor (EGFR)-related protein inhibits multiple  
893 members of the EGFR family in colon and breast cancer cells. *Mol Cancer Ther* **4**, 435-442  
894 (2005).
- 895 24. Ori, A. et al. Spatiotemporal variation of mammalian protein complex stoichiometries.  
896 *Genome Biol* **17**, 47 (2016).
- 897 25. Kanungo, J. Exogenously expressed human Ku70 stabilizes Ku80 in *Xenopus* oocytes and  
898 induces heterologous DNA-PK catalytic activity. *Mol Cell Biochem* **338**, 291-298 (2010).
- 899 26. Chang, H.W. et al. Effect of beta-catenin silencing in overcoming radioresistance of head and  
900 neck cancer cells by antagonizing the effects of AMPK on Ku70/Ku80. *Head Neck* **38 Suppl 1**,  
901 E1909-1917 (2016).
- 902 27. Feng, L. & Chen, J. The E3 ligase RNF8 regulates KU80 removal and NHEJ repair. *Nat Struct*  
903 *Mol Biol* **19**, 201-206 (2012).
- 904 28. Kuperstein, I. et al. Atlas of Cancer Signalling Network: a systems biology resource for  
905 integrative analysis of cancer data with Google Maps. *Oncogenesis* **4**, e160 (2015).
- 906 29. Hanahan, D. & Weinberg, R.A. Hallmarks of cancer: the next generation. *Cell* **144**, 646-674  
907 (2011).
- 908 30. Mackay, H.J. & Twelves, C.J. Targeting the protein kinase C family: are we there yet? *Nat Rev*  
909 *Cancer* **7**, 554-562 (2007).
- 910 31. Engers, R. et al. Protein kinase C in human renal cell carcinomas: role in invasion and  
911 differential isoenzyme expression. *Br J Cancer* **82**, 1063-1069 (2000).
- 912 32. Martignetti, L., Calzone, L., Bonnet, E., Barillot, E. & Zinovyev, A. ROMA: Representation and  
913 Quantification of Module Activity from Target Expression Data. *Front Genet* **7**, 18 (2016).
- 914 33. Ummanni, R. et al. Peroxiredoxins 3 and 4 are overexpressed in prostate cancer tissue and  
915 affect the proliferation of prostate cancer cells in vitro. *J Proteome Res* **11**, 2452-2466 (2012).
- 916 34. Shankavaram, U.T. et al. CellMiner: a relational database and query tool for the NCI-60  
917 cancer cell lines. *BMC genomics* **10**, 277 (2009).
- 918 35. Jones, P. et al. PRIDE: a public repository of protein and peptide identifications for the  
919 proteomics community. *Nucleic Acids Res* **34**, D659-663 (2006).
- 920 36. Brazma, A. et al. ArrayExpress--a public repository for microarray gene expression data at the  
921 EBI. *Nucleic Acids Res* **31**, 68-71 (2003).
- 922 37. Luna, A. et al. rcellminer: exploring molecular profiles and drug response of the NCI-60 cell  
923 lines in R. *Bioinformatics* (2015).
- 924 38. Zoppoli, G. et al. Putative DNA/RNA helicase Schlafen-11 (SLFN11) sensitizes cancer cells to  
925 DNA-damaging agents. *Proc Natl Acad Sci U S A* **109**, 15030-15035 (2012).
- 926 39. Solit, D.B. et al. BRAF mutation predicts sensitivity to MEK inhibition. *Nature* **439**, 358-362  
927 (2006).
- 928 40. de Boer, N.K., van Bodegraven, A.A., Jharap, B., de Graaf, P. & Mulder, C.J. Drug Insight:  
929 pharmacology and toxicity of thiopurine therapy in patients with IBD. *Nat Clin Pract*  
930 *Gastroenterol Hepatol* **4**, 686-694 (2007).
- 931 41. Doench, J.G. et al. Optimized sgRNA design to maximize activity and minimize off-target  
932 effects of CRISPR-Cas9. *Nat Biotechnol* **34**, 184-191 (2016).
- 933 42. Halim, A.B., LeGros, L., Geller, A. & Kotb, M. Expression and functional interaction of the  
934 catalytic and regulatory subunits of human methionine adenosyltransferase in mammalian  
935 cells. *The Journal of biological chemistry* **274**, 29720-29725 (1999).
- 936 43. Flaherty, K.T. et al. Inhibition of mutated, activated BRAF in metastatic melanoma. *The New*  
937 *England journal of medicine* **363**, 809-819 (2010).
- 938 44. Schaeffer, H.J. et al. MP1: a MEK binding partner that enhances enzymatic activation of the  
939 MAP kinase cascade. *Science* **281**, 1668-1671 (1998).
- 940 45. Teis, D., Wunderlich, W. & Huber, L.A. Localization of the MP1-MAPK scaffold complex to  
941 endosomes is mediated by p14 and required for signal transduction. *Dev Cell* **3**, 803-814  
942 (2002).
- 943 46. Jun, S. et al. PAF-mediated MAPK signaling hyperactivation via LAMTOR3 induces pancreatic  
944 tumorigenesis. *Cell Rep* **5**, 314-322 (2013).

- 945 47. De Araujo, M.E. et al. Polymorphisms in the gene regions of the adaptor complex  
946 LAMTOR2/LAMTOR3 and their association with breast cancer risk. *PLoS One* **8**, e53768  
947 (2013).
- 948 48. Borst, P. & Elferink, R.O. Mammalian ABC transporters in health and disease. *Annu Rev*  
949 *Biochem* **71**, 537-592 (2002).
- 950 49. Tang, B. et al. Overexpression of CTNND1 in hepatocellular carcinoma promotes carcinous  
951 characters through activation of Wnt/beta-catenin signaling. *J Exp Clin Cancer Res* **35**, 82  
952 (2016).
- 953 50. Chen, S. et al. Wnt-1 signaling inhibits apoptosis by activating beta-catenin/T cell factor-  
954 mediated transcription. *J Cell Biol* **152**, 87-96 (2001).
- 955 51. Liu, Y., Beyer, A. & Aebersold, R. On the Dependency of Cellular Protein Levels on mRNA  
956 Abundance. *Cell* **165**, 535-550 (2016).
- 957 52. Shao, S. et al. Reproducible Tissue Homogenization and Protein Extraction for Quantitative  
958 Proteomics Using MicroPestle-Assisted Pressure-Cycling Technology. *J Proteome Res* **15**,  
959 1821-1829 (2016).
- 960 53. Dudley, A.M., Janse, D.M., Tanay, A., Shamir, R. & Church, G.M. A global view of pleiotropy  
961 and phenotypically derived gene function in yeast. *Mol Syst Biol* **1**, 2005 0001 (2005).
- 962 54. Wang, Q. et al. Community of protein complexes impacts disease association. *Eur J Hum*  
963 *Genet* **20**, 1162-1167 (2012).
- 964 55. Fraser, H.B. & Plotkin, J.B. Using protein complexes to predict phenotypic effects of gene  
965 mutation. *Genome Biol* **8**, R252 (2007).
- 966 56. Le, D.H. A novel method for identifying disease associated protein complexes based on  
967 functional similarity protein complex networks. *Algorithms Mol Biol* **10**, 14 (2015).
- 968 57. Barretina, J. et al. The Cancer Cell Line Encyclopedia enables predictive modelling of  
969 anticancer drug sensitivity. *Nature* **483**, 603-607 (2012).
- 970 58. Weinstein, J.N. Drug discovery: Cell lines battle cancer. *Nature* **483**, 544-545 (2012).
- 971 59. Abaan, O.D. et al. The exomes of the NCI-60 panel: a genomic resource for cancer biology  
972 and systems pharmacology. *Cancer Res* **73**, 4372-4382 (2013).
- 973 60. Gao, H. et al. High-throughput screening using patient-derived tumor xenografts to predict  
974 clinical trial drug response. *Nat Med* **21**, 1318-1325 (2015).
- 975 61. Papillon-Cavanagh, S. et al. Comparison and validation of genomic predictors for anticancer  
976 drug sensitivity. *J Am Med Inform Assoc* **20**, 597-602 (2013).
- 977 62. Jang, I.S., Neto, E.C., Guinney, J., Friend, S.H. & Margolin, A.A. Systematic assessment of  
978 analytical methods for drug sensitivity prediction from cancer cell line data. *Pacific*  
979 *Symposium on Biocomputing. Pacific Symposium on Biocomputing*, 63-74 (2014).
- 980 63. Kostj, I., Jain, N., Aran, D., Butte, A.J. & Sirota, M. Cross-tissue Analysis of Gene and Protein  
981 Expression in Normal and Cancer Tissues. *Sci Rep* **6**, 24799 (2016).
- 982 64. Schubert, O.T. et al. Building high-quality assay libraries for targeted analysis of SWATH MS  
983 data. *Nat Protoc* **10**, 426-441 (2015).
- 984 65. Craig, R. & Beavis, R.C. A method for reducing the time required to match protein sequences  
985 with tandem mass spectra. *Rapid Commun Mass Spectrom* **17**, 2310-2316 (2003).
- 986 66. MacLean, B., Eng, J.K., Beavis, R.C. & McIntosh, M. General framework for developing and  
987 evaluating database scoring algorithms using the TANDEM search engine. *Bioinformatics* **22**,  
988 2830-2832 (2006).
- 989 67. Tabb, D.L., Fernando, C.G. & Chambers, M.C. MyriMatch: highly accurate tandem mass  
990 spectral peptide identification by multivariate hypergeometric analysis. *J Proteome Res* **6**,  
991 654-661 (2007).
- 992 68. Geer, L.Y. et al. Open mass spectrometry search algorithm. *J Proteome Res* **3**, 958-964 (2004).
- 993 69. Eng, J.K., Jahan, T.A. & Hoopmann, M.R. Comet: an open-source MS/MS sequence database  
994 search tool. *Proteomics* **13**, 22-24 (2013).
- 995 70. Keller, A., Nesvizhskii, A.I., Kolker, E. & Aebersold, R. Empirical statistical model to estimate  
996 the accuracy of peptide identifications made by MS/MS and database search. *Anal Chem* **74**,  
997 5383-5392 (2002).

- 998 71. Shteynberg, D. et al. iProphet: multi-level integrative analysis of shotgun proteomic data  
999 improves peptide and protein identification rates and error estimates. *Molecular & cellular*  
1000 *proteomics : MCP* **10**, M111 007690 (2011).
- 1001 72. Keller, A., Eng, J., Zhang, N., Li, X.J. & Aebersold, R. A uniform proteomics MS/MS analysis  
1002 platform utilizing open XML file formats. *Mol Syst Biol* **1**, 2005 0017 (2005).
- 1003 73. Reiter, L. et al. Protein identification false discovery rates for very large proteomics data sets  
1004 generated by tandem mass spectrometry. *Molecular & cellular proteomics : MCP* **8**, 2405-  
1005 2417 (2009).
- 1006 74. Escher, C. et al. Using iRT, a normalized retention time for more targeted measurement of  
1007 peptides. *Proteomics* **12**, 1111-1121 (2012).
- 1008 75. Reiter, L. et al. Protein Identification False Discovery Rates for Very Large Proteomics Data  
1009 Sets Generated by Tandem Mass Spectrometry. *Molecular & Cellular Proteomics* **8**, 2405-  
1010 2417 (2009).
- 1011 76. Ruepp, A. et al. CORUM: the comprehensive resource of mammalian protein complexes--  
1012 2009. *Nucleic Acids Res* **38**, D497-501 (2010).
- 1013 77. Vinayagam, A. et al. Protein complex-based analysis framework for high-throughput data  
1014 sets. *Sci Signal* **6**, rs5 (2013).
- 1015 78. Ori, A. et al. Cell type-specific nuclear pores: a case in point for context-dependent  
1016 stoichiometry of molecular machines. *Mol Syst Biol* **9**, 648 (2013).
- 1017 79. Friedman, J., Hastie, T. & Tibshirani, R. Regularization Paths for Generalized Linear Models via  
1018 Coordinate Descent. *J Stat Softw* **33**, 1-22 (2010).
- 1019 80. Luna, A. et al. rcellminer: exploring molecular profiles and drug response of the NCI-60 cell  
1020 lines in R. *Bioinformatics* **32**, 1272-1274 (2016).
- 1021
